# Supplementary material for: Structural, spectroscopic and magnetic properties of a novel copper(ii)l-tyrosinato complex
Source: Royal Society of Chemistry journal article supplement (doi:10.1039/c4ra10717a), 2014-01-01
Supplement: c4ra10717a1.pdf [file c4ra10717a1.pdf]

SUPPORTING INFORMATION

**Structural, spectroscopic and magnetic properties of a  
novel copper(II) L-tyrosinato complex**

Agnieszka Wojciechowska <sup>a,\*</sup>, Anna Gągor <sup>b</sup>, Julia Jeziarska <sup>c</sup>,

Marek Duczmal <sup>a</sup>

**Table S1** Crystal data, Experimental details, and Structure Refinement Results for 1

---

|                                                        |                                                                                                                                                |
|--------------------------------------------------------|------------------------------------------------------------------------------------------------------------------------------------------------|
| chemical formula                                       | $C_{18}H_{24}CuN_2O_8$                                                                                                                         |
| $M_w$                                                  | 459.93                                                                                                                                         |
| crystal system                                         | Monoclinic                                                                                                                                     |
| space group                                            | $P2_1$                                                                                                                                         |
| temperature (K)                                        | 295                                                                                                                                            |
| $a / \text{\AA}$                                       | 11.967(1)                                                                                                                                      |
| $b / \text{\AA}$                                       | 5.9986(4),                                                                                                                                     |
| $c / \text{\AA}$                                       | 14.936(1)                                                                                                                                      |
| $\beta / ^\circ$                                       | 102.578(8)                                                                                                                                     |
| $V / \text{\AA}^3$                                     | 1046.4(2)                                                                                                                                      |
| $Z$                                                    | 2                                                                                                                                              |
| Radiation type                                         | Mo $K\alpha$                                                                                                                                   |
| $\mu / \text{mm}^{-1}$                                 | 1.09                                                                                                                                           |
| crystal size / mm                                      | $0.20 \times 0.16 \times 0.11$                                                                                                                 |
| Absorption correction                                  | Multi-scan <i>CrysAlis PRO</i> , Oxford Diffraction Ltd.,<br>Version 1.171.33.42. Empirical absorption correction<br>using spherical harmonics |
| $T_{\min}, T_{\max}$                                   | 0.801, 0.883                                                                                                                                   |
| No. of measured, independent and                       | 11692, 3688, 2641                                                                                                                              |
| observed [ $I > 2\sigma(I)$ ] reflections              |                                                                                                                                                |
| $R_{\text{int}}$                                       | 0.052                                                                                                                                          |
| $(\sin \theta/\lambda)_{\text{max}} (\text{\AA}^{-1})$ | 0.610                                                                                                                                          |
| $R[F^2 > 2\sigma(F^2)]$                                | 0.051                                                                                                                                          |
| $wR(F^2)$                                              | 0.134                                                                                                                                          |

---

---

|                                                             |                                                                        |
|-------------------------------------------------------------|------------------------------------------------------------------------|
| $S$                                                         | 0.93                                                                   |
| no. of reflections                                          | 3688                                                                   |
| no. of parameters                                           | 273                                                                    |
| no. of restraints                                           | 8                                                                      |
| H-atom treatment                                            | H atoms treated by a mixture of independent and constrained refinement |
| $\Delta\rho_{\max}, \Delta\rho_{\min} / e \text{ \AA}^{-3}$ | 0.68, -0.26                                                            |
| absolute structure                                          | [1]                                                                    |
| flack parameter <sup>53</sup>                               | -0.02(2)                                                               |

---

[1] H. D. Flack, Acta Crystallogr., Sect. A: Found. Crystallogr.1983, 39, 876.

**Table S2** Selected Bond ( $\text{\AA}$ ) Distances and Angles (deg) in complex 1

---

|       |            |         |            |
|-------|------------|---------|------------|
| O1—C2 | 1.258 (7)  | O3—H31  | 0.98 (2)   |
| O2—C2 | 1.272 (7)  | O4—C10  | 1.271 (7)  |
| N1—C1 | 1.471 (8)  | O5—C10  | 1.221 (8)  |
| C1—C2 | 1.523 (8)  | N2—C11  | 1.471 (7)  |
| C1—C3 | 1.543 (8)  | C10—C11 | 1.543 (8)  |
| C1—H1 | 0.98 (2)   | C11—C12 | 1.536 (9)  |
| C3—C4 | 1.510 (8)  | C12—C13 | 1.503 (9)  |
| C4—C9 | 1.386 (11) | C13—C14 | 1.343 (10) |
| C4—C5 | 1.384 (8)  | C13—C18 | 1.393 (10) |
| C5—C6 | 1.402 (9)  | C14—C15 | 1.429 (10) |
| C6—C7 | 1.372 (10) | C15—C16 | 1.372 (10) |

|          |            |              |            |
|----------|------------|--------------|------------|
| C7—O3    | 1.363 (8)  | C16—C17      | 1.365 (12) |
| C7—C8    | 1.376 (9)  | C16—O6       | 1.367 (8)  |
| C8—C9    | 1.402 (10) | C17—C18      | 1.388 (8)  |
|          |            | O6—H61       | 0.90 (2)   |
| N1—C1—C2 | 107.0 (5)  | C4—C9—C8     | 121.2 (6)  |
| N1—C1—C3 | 111.7 (4)  | C7—O3—H31    | 113 (2)    |
| O1—C2—O2 | 123.9 (5)  | O5—C10—O4    | 123.4 (6)  |
| O1—C2—C1 | 118.9 (5)  | O5—C10—C11   | 119.9 (5)  |
| O2—C2—C1 | 117.1 (6)  | O4—C10—C11   | 116.6 (5)  |
| C4—C3—C1 | 114.2 (5)  | N2—C11—C12   | 114.2 (5)  |
| C9—C4—C5 | 117.8 (5)  | N2—C11—C10   | 108.9 (5)  |
| C9—C4—C3 | 121.4 (5)  | C12—C11—C10  | 112.2 (5)  |
| C5—C4—C3 | 120.8 (5)  | C12—C11—HC11 | 116 (5)    |
| C4—C5—C6 | 121.5 (6)  | C10—C11—HC11 | 105 (7)    |
| C7—C6—C5 | 119.5 (6)  | C14—C13—C18  | 117.0 (7)  |
| O3—C7—C6 | 122.1 (6)  | C14—C13—C12  | 122.8 (6)  |
| O3—C7—C8 | 117.5 (6)  | C18—C13—C12  | 120.3 (6)  |
| C6—C7—C8 | 120.4 (6)  | C13—C14—C15  | 123.4 (7)  |
| C7—C8—C9 | 119.6 (7)  | C16—C15—C14  | 117.1 (7)  |
|          |            | C17—C16—C15  | 121.1 (7)  |
|          |            | C17—C16—O6   | 122.2 (7)  |
|          |            | C15—C16—O6   | 116.7 (7)  |
|          |            | C16—C17—C18  | 119.7 (8)  |
|          |            | C17—C18—C13  | 121.6 (8)  |

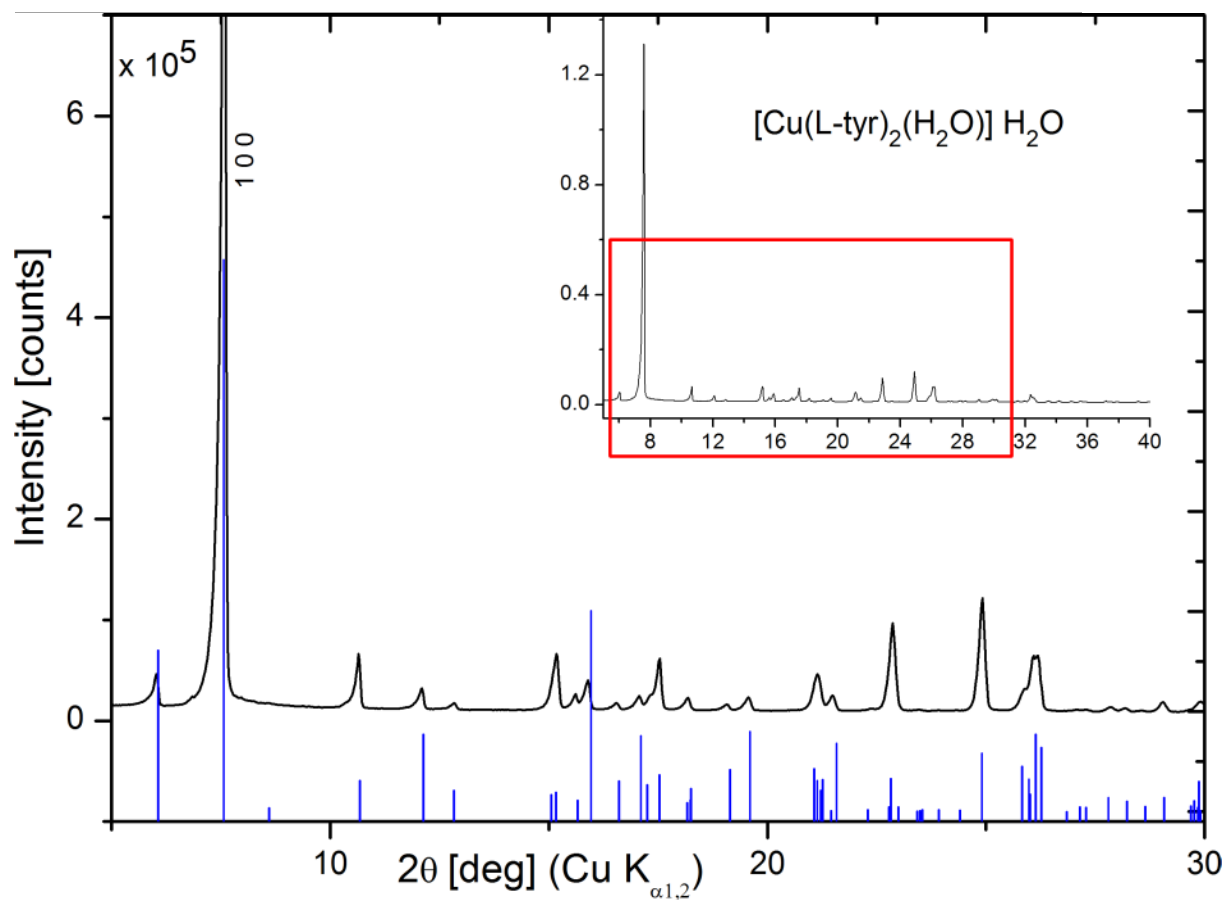

Fig. S1. XRD pattern for complex 1.

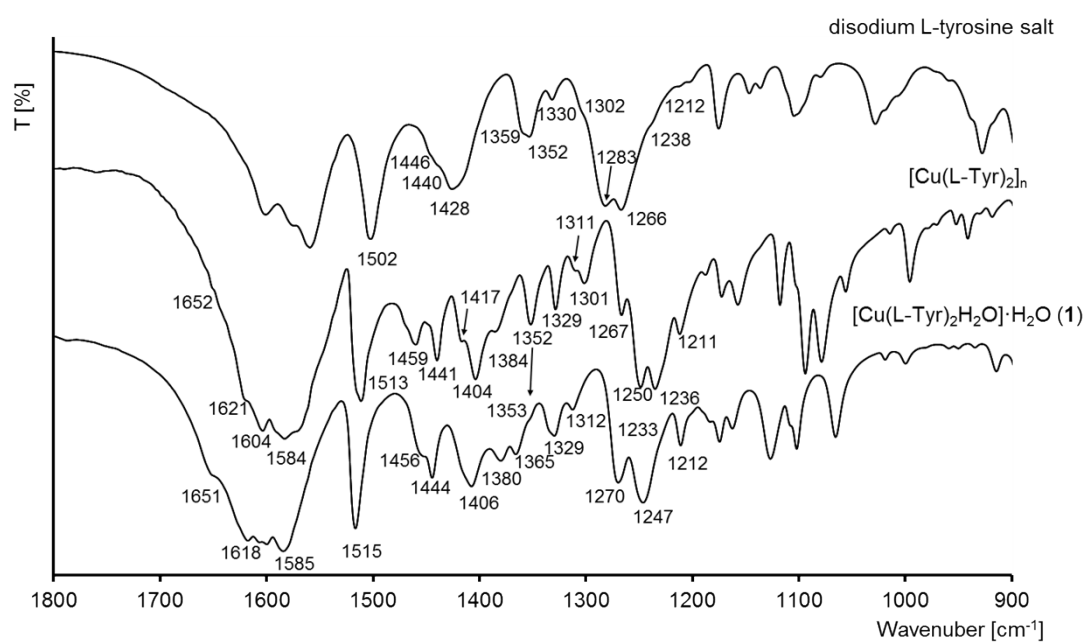

**Fig. S2** Vibrational FT-IR spectra of disodium L-tyrosine salt,  $[\text{Cu}(\text{L-Tyr})_2]_n$  and complex **1**

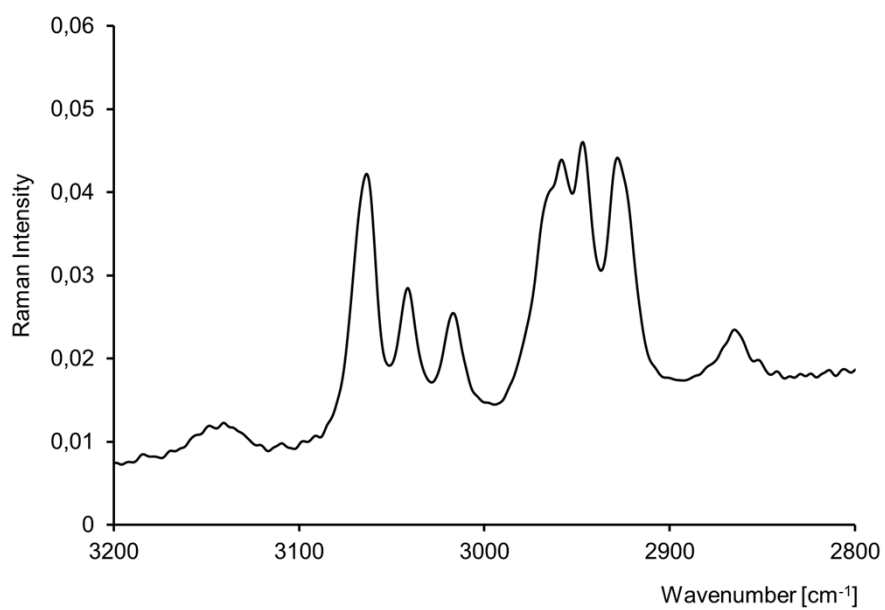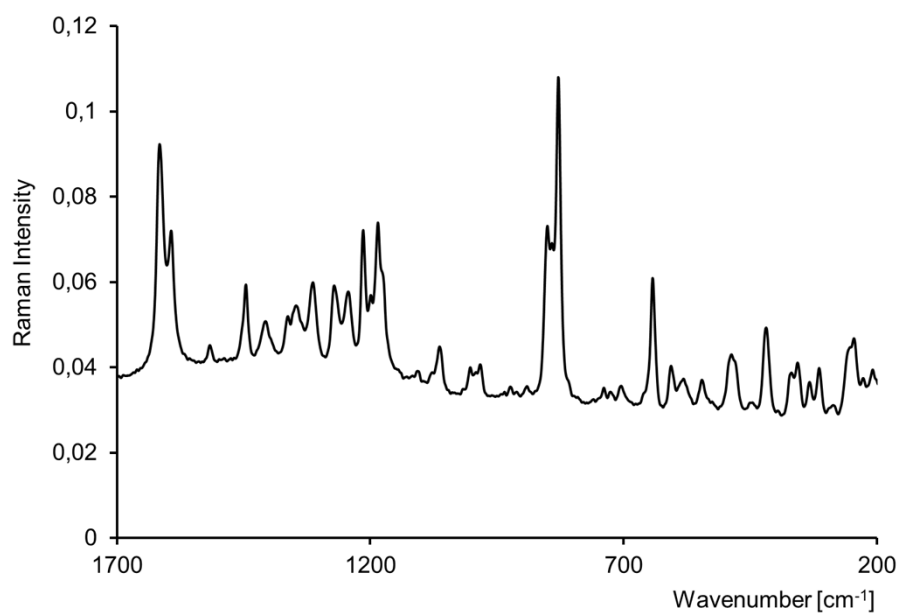

**Fig. S3** Raman spectra of complex **1**

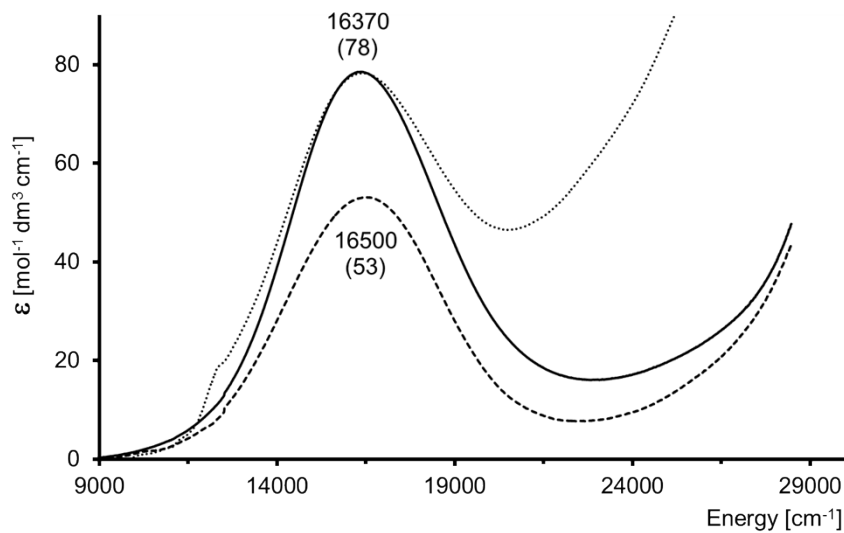

**Fig. S4.** Absorbance spectrum of **1** in : solid line – DMSO; broken line – MeOH, dotted line – in DMSO after 5 months.

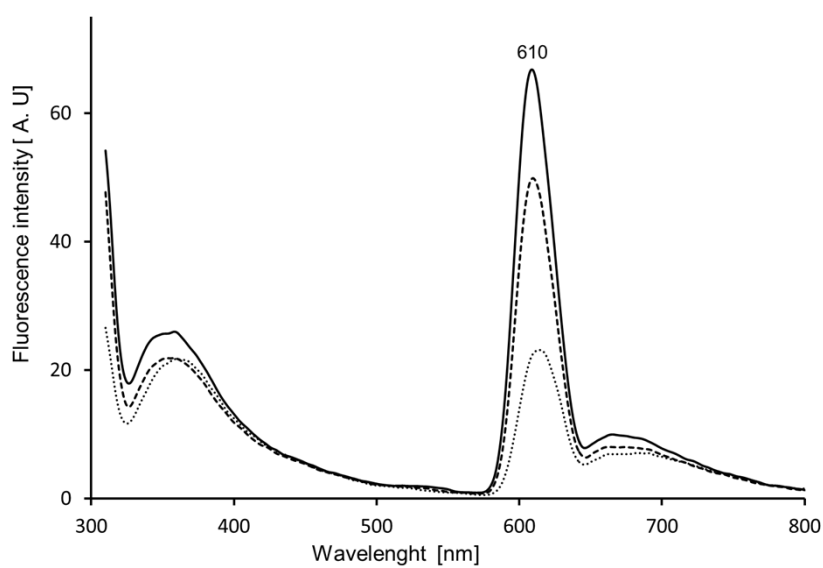

**Fig. S5.** Fluorescence emission spectra of **1** in DMSO (solid line – 0,125 mg/ml, broken line – 0,25 mg/mol, dotted line – 0,5 mg/ml) at  $\lambda_{\text{ex}} = 303 \text{ nm}$ .
